# Supplementary material for: Readiness of primary health care facilities for non-communicable disease services in Port Sudan, Sudan: a WHO Service Availability and Readiness Assessment (SARA) cross-sectional study
Source: Research Square preprint supplement (doi:10.21203/rs.3.rs-8535023/v1), 2026-02-19
Supplement: Supplementary file 1 [file 6f949f4d2ebe7330bf538723.docx]

**Questionnaire**

**A) Primary healthcare facility characteristics:**

**1. Name of health center:**

**2. Facilities divided by Sectors:**

a) Eastern Sector

b) Middle Sector

c) Southern

**3. Type of health center:**

a) Family Health Center

b) Community Health Package

c) Family Health Reference Center

d) Family Health Unit

**4. Patient type:**

a) Inpatients

b) Outpatients

**5. Number of inpatients/day:**

**6. Number of outpatients per day:**

**7. Number of beds:**

**8. Distance to nearest hospital (km):**

**9. Distance to the nearest clinic (km):**

**10. health insurance:**

a) Yes

b) No

**11. Number of workers:**

**B) Status of general service readiness indicators of the primary health facilities**

**1. Domain 1(Basic amenities)**

Power (Electricity)

Improved water source facility premises

Room privacy for patient consultations

Access to adequate sanitation facilities for clients

Communication equipment

Access to a computer with internet access

Emergency transportation

**2. Domain 2 (Basic equipment)**

Adult scale

Child scale

Thermometer

Stethoscope

Blood pressure apparatus

Light source

**3. Domain 3 (Standard precautions for infection prevention)**

Safe final disposal of sharps

Safe final disposal of infectious wastes

Appropriate storage of sharps waste

Appropriate storage of infectious waste

Disinfectant

Single-use, standard disposable or auto-disable syringes

Soap and running water or alcohol-based hand rub

Latex gloves 24 (96%)

Guidelines for standard precautions 11 (44%)

**4. Domain 4 (Diagnostic capacity)**

Hemoglobin

Blood glucose

Malaria diagnostic capacity

Urine dipstick - protein

Urine dipstick - glucose

Urine pregnancy test

HIV diagnostic capacity

Syphilis RDT

**5. Domain 5 (Essential medicines)**

Amlodipine tablet or alternative calcium channel blockers

Amoxicillin oral suspension or dispersible tablet

Amoxicillin tablet

Ampicillin powder for injection

Aspirin

Beclomethasone inhaler

Beta-blockers (atenolol)

Ceftriaxone injection

Enalapril tablet or an alternative ACE inhibitor such as lisinopril, ramipril, or perindopril

Fluoxetine tablets

Gentamicin injection

Glibenclamide tablets

Regular insulin injection

Metformin tablets

Omeprazole tablets or an alternative such as pantoprazole or rabeprazole

Oral rehydration solution (ORS)

Thiazid

Salbutamol tablets or spray

Simvastatin tablets or another statin such as atorvastatin, pravastatin, or Fluvastatin

Zinc sulfate tablets

Magnesium sulfate injectable

Haloperidol tablets

Carbamazepine tablets

Diazepam injection

Oxytocin injection

**C) Status of Cardiovascular service readiness indicators of the primary health**

**1. Cardiovascular availability**

Are your providers involved in these diagnostic and/or cardiovascular services?

**2. Cardiovascular readiness**

Do you have a national resolution for cardiology and internal medicine diagnosis?

Has at least one employee received in-service training in cardiovascular services during the 24 months prior to the survey?

**3. Equipment**

Stethoscope

Blood pressure

Adult weighing scale

Oxygen

**4. Medicines currently available in cardiovascular medicine**

Amlodipine/nifedipine

Beta-blockers (atenolol)

Aspirin

Thiazide

Metformin

Enalapril tablets or an alternative ACE inhibitor such as lisinopril, ramipril, or perindopril

**D) Status of DM-related service readiness indicators of the primary health facilities**

1. **Diabetes availability**

Are providers involved in these services and/or diabetes management programs?

**2. Diabetes readiness**

Do you have a national diabetes diagnostic design?

Has at least one employee received on-the-job training in a diabetes service within the 24 months prior to the survey?

**3. Does this facility do the testing**

Blood glucose

Urine protein

Urine ketone

**4. Equipment**

Blood pressure

Adult weighing scale

Height board/stadiometer

**5. Medicines invented for diabetes and/or currently in use**

Metformin

Glibenclamide

Injectable insulin

Injectable glucose solution

Gliclazide tablets or glipizide tablets

**E) Status of CRD-related service readiness indicators of the primary health facilities**

**1. Chronic respiratory disease availability**

Will you provide services in these diagnostic and/or chronic disease management services?

**2. Chronic respiratory disease readiness**

Do you have the national guidelines for the diagnosis of Chronic Systemic Diseases?

Has at least one staff member received training on a chronic systemic disease service within the 24 months prior to the survey?

**3. Equipment**

Stethoscope

Oxygen flowmeter

Spacers for inhalers

Oxygen

**4. Medicines currently used in the chronic systemic disease setting**

Salbutamol inhaler

Beclomethasone inhaler

Prednisolone capsule/tablet

Hydrocortisone injection

Epinephrine injectable
